# Supplementary material for: Synthesis of Novel α-Trifluorothioanisole Derivatives Containing Phenylpyridine Moieties with Herbicidal Activity
Source: MDPI journal article supplement (doi:10.3390/molecules27185879), 2022-09-10
Supplement: s1 [file s1]

Article

# Synthesis of Novel $\alpha$ -Trifluorothioanisole Derivatives Containing Phenylpyridine Moieties with Herbicidal Activity

Zengfei Cai <sup>1</sup>, Wenliang Zhang <sup>1</sup>, Zhongjie Yan <sup>2</sup> and Xiaohua Du <sup>1,\*</sup>

<sup>1</sup> Catalytic Hydrogenation Research Center, Zhejiang Key Laboratory of Green Pesticides and Cleaner Production Technology, Zhejiang Green Pesticide Collaborative Innovation Center, Zhejiang University of Technology, Hangzhou 310014, P. R. China

<sup>2</sup> Agrowin(Ningbo) bioscience Co., Ltd., Ningbo, 315100, China.

\* Correspondence: duxiaohua@zjut.edu.cn (X.-H.D.)

## Supporting Information

### Contents

1. Data of 5a in Single-crystal X-ray Diffraction ..... 2
2. <sup>1</sup>H NMR spectra and <sup>13</sup>C NMR spectra of target compounds 5a-5f, 6a-6f, and 7a-7f.... 5

## 1. Data of 5a in Single-crystal X-ray Diffraction

**Table S1.** Crystal data and structure refinement parameters of compound 5a.

| Parameter                                           | Value                                                           |
|-----------------------------------------------------|-----------------------------------------------------------------|
| Empirical formula                                   | C <sub>20</sub> H <sub>12</sub> ClF <sub>6</sub> NOS            |
| Formula weight                                      | 463.82                                                          |
| Temperature                                         | 296 K                                                           |
| Wavelength                                          | 1.34139 Å                                                       |
| Crystal system                                      | Triclinic                                                       |
| Space group                                         | <i>P</i> -1                                                     |
| Unit cell dimensions                                | <i>a</i> = 4.9349(3) Å $\alpha$ = 82.102(3)°                    |
|                                                     | <i>b</i> = 8.7426(6) Å $\beta$ = 89.490(3)°                     |
|                                                     | <i>c</i> = 23.4328(14) Å $\gamma$ = 78.286(3)°                  |
| Volume                                              | 980.35(11) Å <sup>3</sup>                                       |
| <i>Z</i>                                            | 2                                                               |
| Density (calculated)                                | 1.571 Mg/m <sup>3</sup>                                         |
| Absorption coefficient                              | 2.183 mm <sup>-1</sup>                                          |
| <i>F</i> (000)                                      | 468                                                             |
| Crystal size                                        | 0.16 × 0.12 × 0.08 mm <sup>3</sup>                              |
| Theta range for data collection                     | 3.314 to 55.348°                                                |
| Index ranges                                        | -6 ≤ <i>h</i> ≤ 6, -8 ≤ <i>k</i> ≤ 10, -28 ≤ <i>l</i> ≤ 28      |
| Reflections collected                               | 12877                                                           |
| Independent reflections                             | 3689 [R(int) = 0.0604]                                          |
| Completeness to theta = 53.594°                     | 99.3%                                                           |
| Absorption correction                               | Semi-empirical from equivalents                                 |
| Max. and min. transmission                          | 0.7508 and 0.3676                                               |
| Refinement method                                   | Full-matrix least-squares on <i>F</i> <sup>2</sup>              |
| Data / restraints / parameters                      | 3689 / 0 / 271                                                  |
| Goodness-of-fit on <i>F</i> <sup>2</sup>            | 1.081                                                           |
| Final <i>R</i> indices [ <i>I</i> > 2σ( <i>I</i> )] | <i>R</i> <sub>1</sub> = 0.0616, <i>wR</i> <sub>2</sub> = 0.1787 |
| <i>R</i> indices (all data)                         | <i>R</i> <sub>1</sub> = 0.0718, <i>wR</i> <sub>2</sub> = 0.1900 |
| Extinction coefficient                              | None                                                            |
| Largest diff. peak and hole                         | 0.549 and -0.369 e.Å <sup>-3</sup>                              |

### Crystal structure determination of 5a

Crystal Data. C<sub>20</sub>H<sub>12</sub>ClF<sub>6</sub>NOS (*M* = 463.82 g/mol): triclinic, space group *P*-1, *a* = 4.9349(3) Å, *b* = 8.7426(6) Å, *c* = 23.4328(14) Å,  $\beta$  = 89.490(3)°, *V* = 980.35(11) Å<sup>3</sup>, *Z* = 2, *T* = 298 K, *D*<sub>calc</sub> = 1.571 Mg/m<sup>3</sup>, 12877 reflections measured (3.314° ≤ 2θ ≤ 55.348°), 3689 unique (*R*<sub>int</sub> = 0.0604) which were used in all calculations. The final *R*<sub>1</sub> was 0.0616 (*I* > 2σ(*I*)) and *wR*<sub>2</sub> was 0.1787 (all data).

**Table S2.** Bond angles of compound 5a.

| Atoms            | Angle (°)  | Atoms               | Angle (°) |
|------------------|------------|---------------------|-----------|
| C(20)-S(1)-C(17) | 100.49(14) | C(10)-C(11)-H(11)   | 119.9     |
| C(10)-O(1)-C(13) | 118.2(2)   | C(12)-C(11)-C(10)   | 120.2(3)  |
| C(1)-N(1)-C(5)   | 119.5(2)   | C(12)-C(11)-H(11)   | 119.9     |
| N(1)-C(1)-H(1)   | 118.3      | C(7)-C(12)-H(12)    | 119.6     |
| N(1)-C(1)-C(2)   | 123.4(3)   | C(11)-C(12)-C(7)    | 120.8(3)  |
| C(2)-C(1)-H(1)   | 118.3      | C(11)-C(12)-H(12)   | 119.6     |
| C(1)-C(2)-C(3)   | 118.3(2)   | O(1)-C(13)-H(13A)   | 109.7     |
| C(1)-C(2)-C(6)   | 121.4(3)   | O(1)-C(13)-H(13B)   | 109.7     |
| C(3)-C(2)-C(6)   | 120.3(3)   | O(1)-C(13)-C(14)    | 109.8(2)  |
| C(2)-C(3)-H(3)   | 120.8      | H(13A)-C(13)-H(13B) | 108.2     |
| C(4)-C(3)-C(2)   | 118.5(3)   | C(14)-C(13)-H(13A)  | 109.7     |
| C(4)-C(3)-H(3)   | 120.8      | C(14)-C(13)-H(13B)  | 109.7     |
| C(3)-C(4)-Cl(1)  | 116.3(2)   | C(15)-C(14)-C(13)   | 122.0(3)  |
| C(3)-C(4)-C(5)   | 120.8(2)   | C(19)-C(14)-C(13)   | 119.3(3)  |

|                  |            |                   |          |
|------------------|------------|-------------------|----------|
| C(5)-C(4)-Cl(1)  | 122.82(19) | C(19)-C(14)-C(15) | 118.7(3) |
| N(1)-C(5)-C(4)   | 119.5(2)   | C(14)-C(15)-H(15) | 119.7    |
| N(1)-C(5)-C(7)   | 114.7(2)   | C(16)-C(15)-C(14) | 120.5(3) |
| C(4)-C(5)-C(7)   | 125.8(2)   | C(16)-C(15)-H(15) | 119.7    |
| F(1)-C(6)-F(2)   | 107.5(3)   | C(15)-C(16)-H(16) | 120.3    |
| F(1)-C(6)-F(3)   | 107.8(3)   | C(17)-C(16)-C(15) | 119.3(3) |
| F(1)-C(6)-C(2)   | 113.0(3)   | C(17)-C(16)-H(16) | 120.3    |
| F(2)-C(6)-C(2)   | 111.9(3)   | C(16)-C(17)-S(1)  | 119.0(2) |
| F(3)-C(6)-F(2)   | 103.9(3)   | C(18)-C(17)-S(1)  | 120.9(2) |
| F(3)-C(6)-C(2)   | 112.2(3)   | C(18)-C(17)-C(16) | 120.1(3) |
| C(8)-C(7)-C(5)   | 120.0(2)   | C(17)-C(18)-H(18) | 120      |
| C(8)-C(7)-C(12)  | 117.9(2)   | C(19)-C(18)-C(17) | 120.1(3) |
| C(12)-C(7)-C(5)  | 122.2(2)   | C(19)-C(18)-H(18) | 120      |
| C(7)-C(8)-H(8)   | 119        | C(14)-C(19)-H(19) | 119.4    |
| C(7)-C(8)-C(9)   | 122.0(3)   | C(18)-C(19)-C(14) | 121.3(3) |
| C(9)-C(8)-H(8)   | 119        | C(18)-C(19)-H(19) | 119.4    |
| C(8)-C(9)-H(9)   | 120.6      | F(4)-C(20)-S(1)   | 115.1(3) |
| C(10)-C(9)-C(8)  | 118.8(3)   | F(4)-C(20)-F(5)   | 106.8(3) |
| C(10)-C(9)-H(9)  | 120.6      | F(4)-C(20)-F(6)   | 103.1(3) |
| O(1)-C(10)-C(9)  | 124.6(3)   | F(5)-C(20)-S(1)   | 108.8(3) |
| O(1)-C(10)-C(11) | 115.0(2)   | F(5)-C(20)-F(6)   | 107.8(3) |
| C(11)-C(10)-C(9) | 120.4(2)   | F(6)-C(20)-S(1)   | 114.8(2) |

**Table S3.** Atomic coordinates ( $\times 10^4$ ) and equivalent isotropic displacement parameters ( $\text{\AA}^2 \times 10^3$ ) of the nonhydrogen atoms.

| Atom   | <i>x</i> | <i>y</i> | <i>z</i> | <i>U</i> <sub>eq</sub> |
|--------|----------|----------|----------|------------------------|
| Cl (1) | 4881(2)  | 3250(1)  | 2604(2)  | 101(1)                 |
| Cl(1)  | -1097(2) | 3964(1)  | 9436(1)  | 65(1)                  |
| S(1)   | 17002(2) | -2331(1) | 6020(1)  | 80(1)                  |
| F(1)   | -8858(6) | 8902(3)  | 9528(1)  | 138(1)                 |
| F(2)   | -6219(5) | 10543(3) | 9363(1)  | 106(1)                 |
| F(3)   | -9021(5) | 10381(3) | 8726(1)  | 110(1)                 |
| F(4)   | 13799(5) | -4278(3) | 5864(1)  | 104(1)                 |
| F(5)   | 17528(6) | -4524(3) | 5407(2)  | 129(1)                 |
| F(6)   | 14065(7) | -2681(3) | 5144(1)  | 118(1)                 |
| O(1)   | 6881(4)  | 2066(2)  | 7347(1)  | 67(1)                  |
| N(1)   | -2314(5) | 7505(3)  | 8130(1)  | 63(1)                  |
| C(1)   | -4263(7) | 8538(3)  | 8350(1)  | 64(1)                  |
| C(2)   | -5204(5) | 8292(3)  | 8902(1)  | 54(1)                  |
| C(3)   | -4115(5) | 6879(3)  | 9243(1)  | 55(1)                  |
| C(4)   | -2139(5) | 5791(3)  | 9012(1)  | 49(1)                  |
| C(5)   | -1198(5) | 6125(3)  | 8455(1)  | 48(1)                  |
| C(6)   | -7342(7) | 9509(3)  | 9134(2)  | 69(1)                  |
| C(7)   | 909(5)   | 5055(3)  | 8160(1)  | 48(1)                  |
| C(8)   | 682(6)   | 5047(3)  | 7575(1)  | 57(1)                  |
| C(9)   | 2609(6)  | 4070(3)  | 7280(1)  | 58(1)                  |
| C(10)  | 4852(5)  | 3100(3)  | 7584(1)  | 54(1)                  |
| C(11)  | 5154(6)  | 3106(3)  | 8168(1)  | 58(1)                  |
| C(12)  | 3207(5)  | 4063(3)  | 8456(1)  | 54(1)                  |
| C(13)  | 6923(6)  | 2141(4)  | 6750(1)  | 66(1)                  |
| C(14)  | 9411(5)  | 999(3)   | 6577(1)  | 56(1)                  |
| C(15)  | 10724(6) | -304(4)  | 6954(1)  | 65(1)                  |
| C(16)  | 12987(6) | -1345(4) | 6779(1)  | 65(1)                  |
| C(17)  | 13958(5) | -1060(3) | 6226(1)  | 56(1)                  |
| C(18)  | 12648(7) | 226(4)   | 5852(1)  | 67(1)                  |
| C(19)  | 10402(7) | 1238(4)  | 6028(1)  | 65(1)                  |
| C(20)  | 15528(7) | -3485(4) | 5595(2)  | 70(1)                  |

**Table S4.** Hydrogen coordinates ( $\times 10^4$ ) and isotropic displacement parameters ( $\text{\AA}^2 \times 10^3$ ).

| Atom   | <i>x</i> | <i>y</i> | <i>z</i> | <i>U</i> <sub>eq</sub> |
|--------|----------|----------|----------|------------------------|
| H (1)  | 467      | 3247     | -1520    | 110                    |
| H(1)   | -5044    | 9495     | 8114     | 77                     |
| H(3)   | -4715    | 6665     | 9626     | 66                     |
| H(8)   | -839     | 5730     | 7366     | 68                     |
| H(9)   | 2393     | 4067     | 6878     | 69                     |
| H(11)  | 6711     | 2448     | 8373     | 70                     |
| H(12)  | 3421     | 4051     | 8859     | 65                     |
| H(13A) | 7000     | 3226     | 6572     | 79                     |
| H(13B) | 5210     | 1877     | 6611     | 79                     |
| H(15)  | 10067    | -484     | 7335     | 79                     |
| H(16)  | 13861    | -2244    | 7035     | 79                     |
| H(18)  | 13300    | 411      | 5471     | 81                     |
| H(19)  | 9512     | 2122     | 5767     | 78                     |

**Table S5.** Bond lengths of compound 5a.

| Atoms      | Length (Å) | Atoms        | Length (Å) |
|------------|------------|--------------|------------|
| Cl(1)-C(4) | 1.744(2)   | C(7)-C(12)   | 1.402(4)   |
| S(1)-C(17) | 1.783(3)   | C(8)-H(8)    | 0.95       |
| S(1)-C(20) | 1.768(4)   | C(8)-C(9)    | 1.389(4)   |
| F(1)-C(6)  | 1.305(4)   | C(9)-H(9)    | 0.95       |
| F(2)-C(6)  | 1.324(4)   | C(9)-C(10)   | 1.385(4)   |
| F(3)-C(6)  | 1.319(4)   | C(10)-C(11)  | 1.379(4)   |
| F(4)-C(20) | 1.310(4)   | C(11)-H(11)  | 0.95       |
| F(5)-C(20) | 1.316(4)   | C(11)-C(12)  | 1.376(4)   |
| F(6)-C(20) | 1.317(4)   | C(12)-H(12)  | 0.95       |
| O(1)-C(10) | 1.374(3)   | C(13)-H(13A) | 0.99       |
| O(1)-C(13) | 1.392(4)   | C(13)-H(13B) | 0.99       |
| N(1)-C(1)  | 1.331(4)   | C(13)-C(14)  | 1.508(4)   |
| N(1)-C(5)  | 1.350(3)   | C(14)-C(15)  | 1.389(4)   |
| C(1)-H(1)  | 0.95       | C(14)-C(19)  | 1.376(4)   |
| C(1)-C(2)  | 1.373(4)   | C(15)-H(15)  | 0.95       |
| C(2)-C(3)  | 1.385(4)   | C(15)-C(16)  | 1.388(4)   |
| C(2)-C(6)  | 1.495(4)   | C(16)-H(16)  | 0.95       |
| C(3)-H(3)  | 0.95       | C(16)-C(17)  | 1.385(4)   |
| C(3)-C(4)  | 1.380(3)   | C(17)-C(18)  | 1.375(4)   |
| C(4)-C(5)  | 1.395(4)   | C(18)-H(18)  | 0.95       |
| C(5)-C(7)  | 1.484(3)   | C(18)-C(19)  | 1.370(4)   |
| C(7)-C(8)  | 1.379(4)   | C(19)-H(19)  | 0.95       |

2.  $^1\text{H}$  NMR and  $^{13}\text{C}$  NMR spectra of target compounds 5a-5f, 6a-6f, and 7a-7f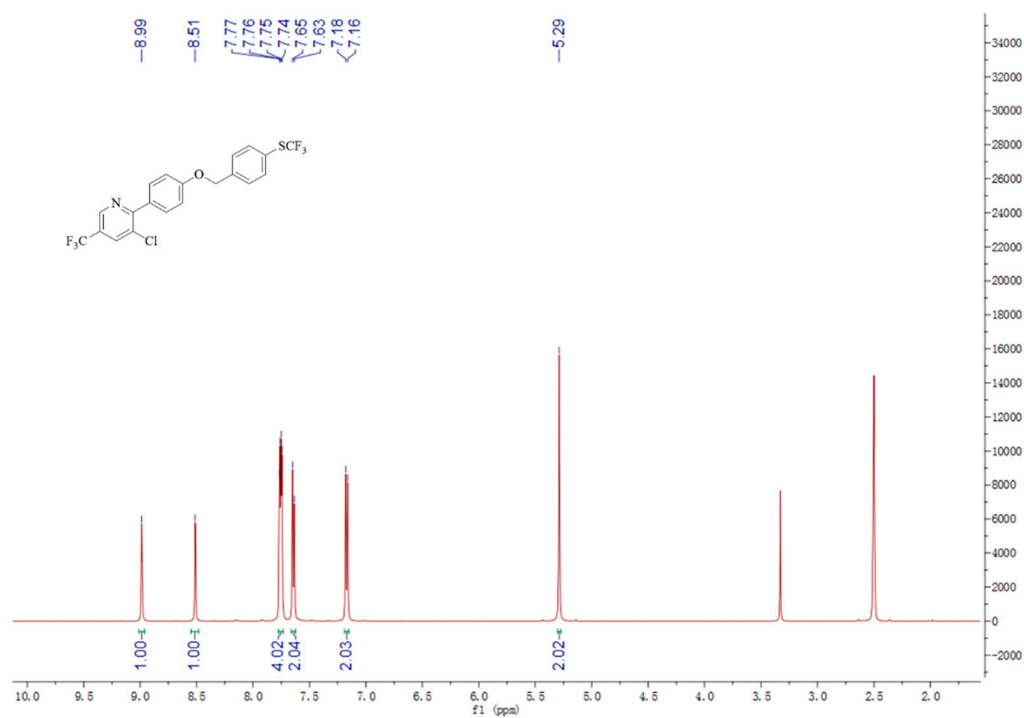Figure S1. The  $^1\text{H}$  NMR spectrum of 5a.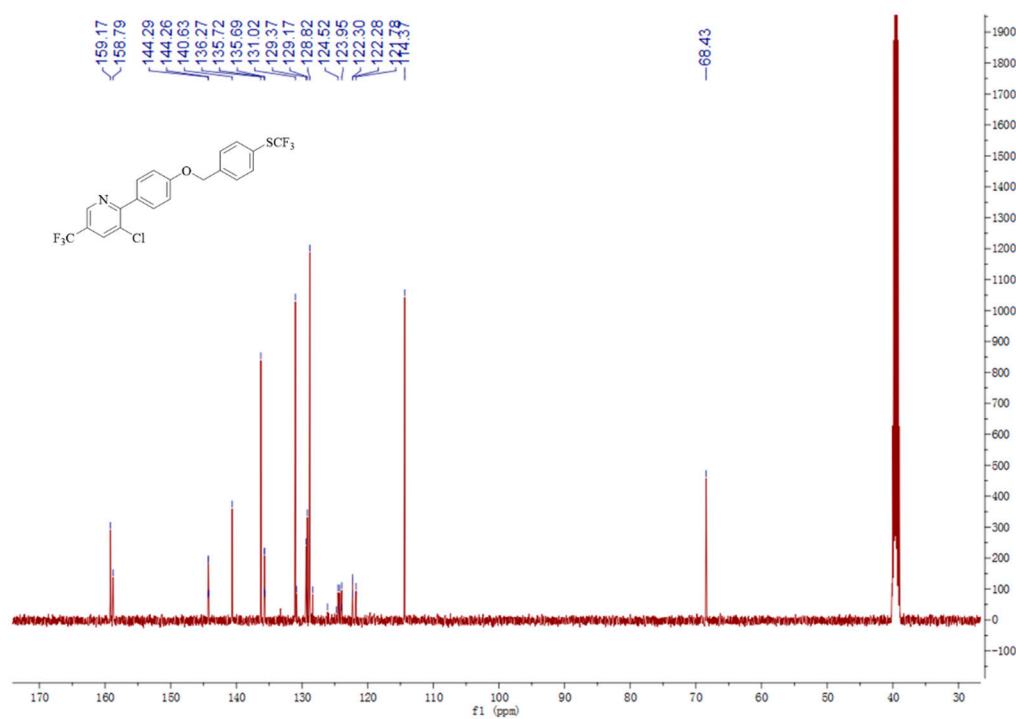Figure S2. The  $^{13}\text{C}$  NMR spectrum of 5a.

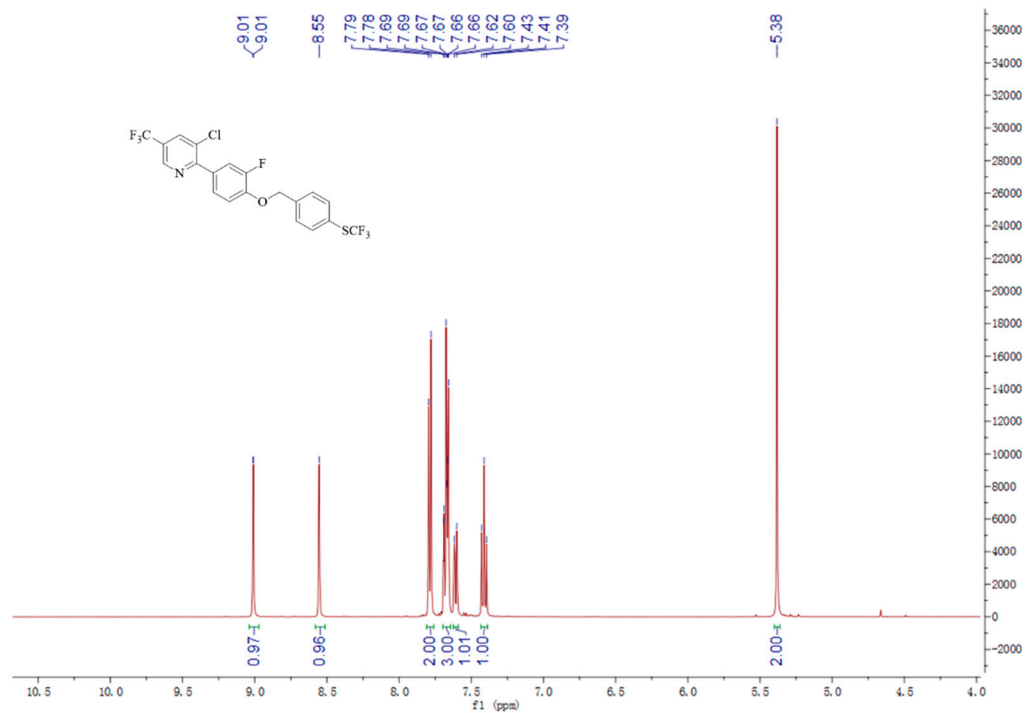

Figure S3. The <sup>1</sup>H NMR spectrum of **5b**.

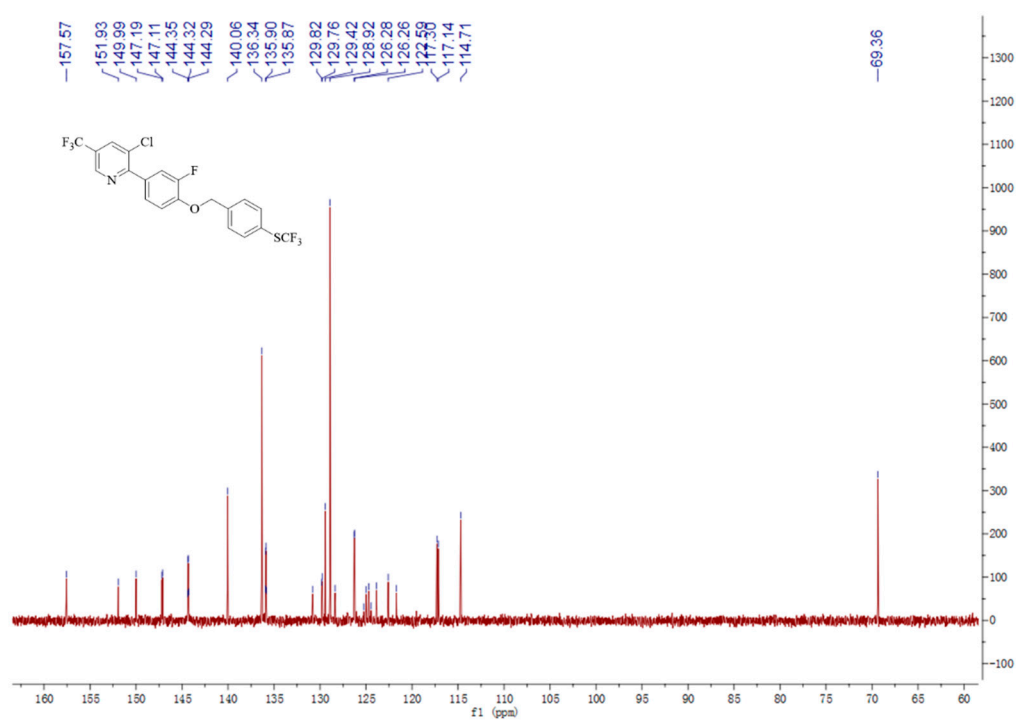

Figure S4. The <sup>13</sup>C NMR spectrum of **5b**.

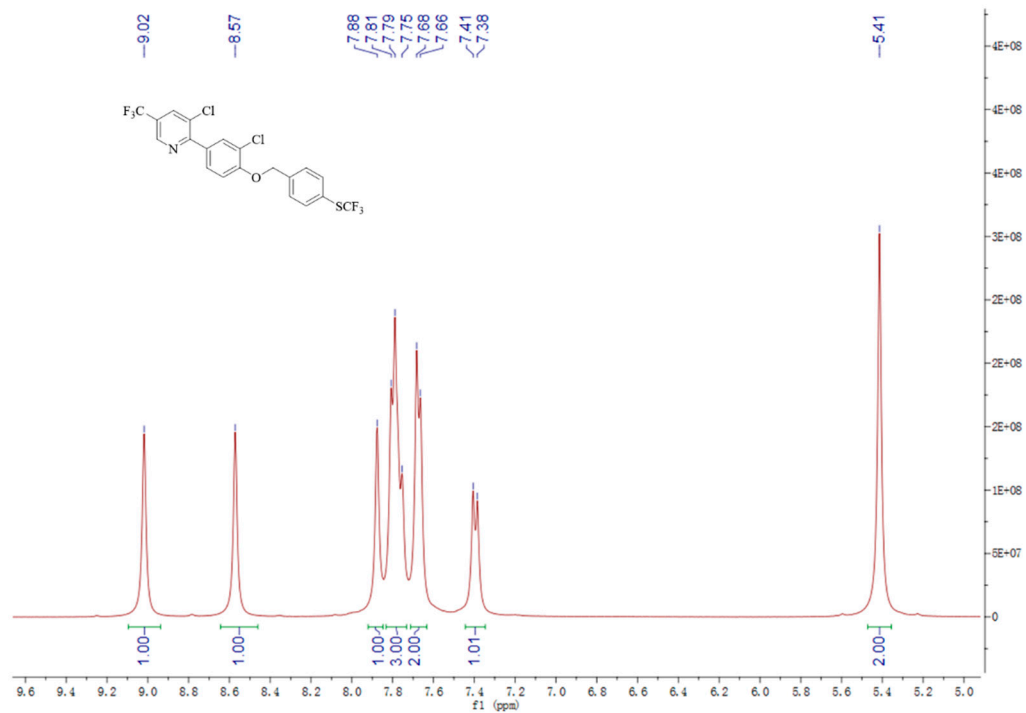

**Figure S5.** The <sup>1</sup>H NMR spectrum of **5c**.

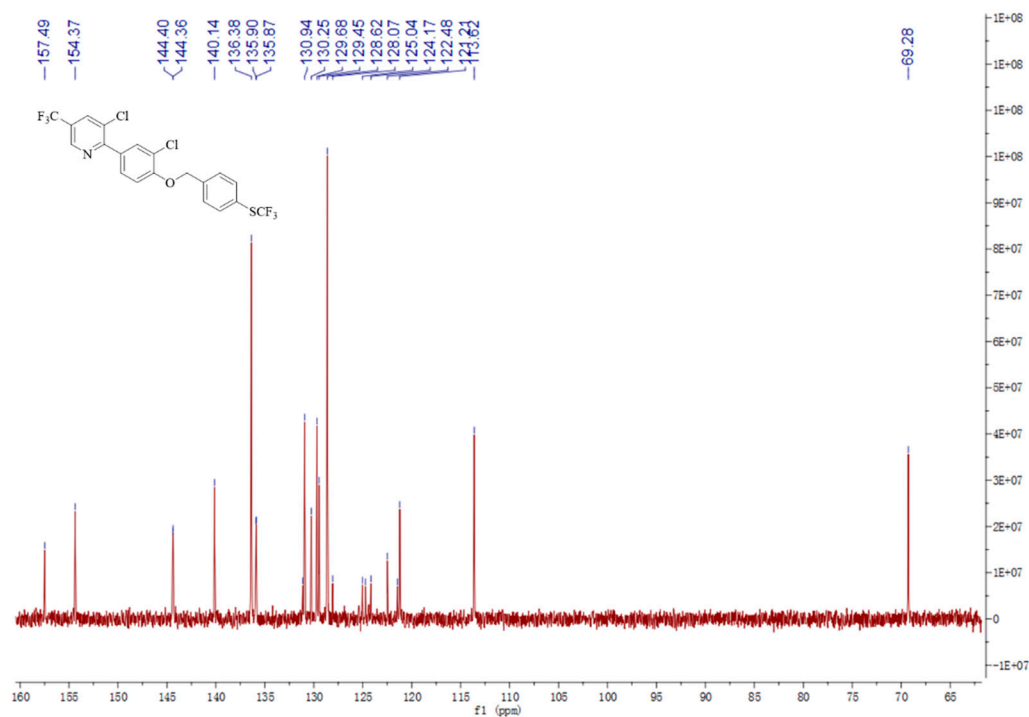

**Figure S6.** The <sup>13</sup>C NMR spectrum of **5c**.

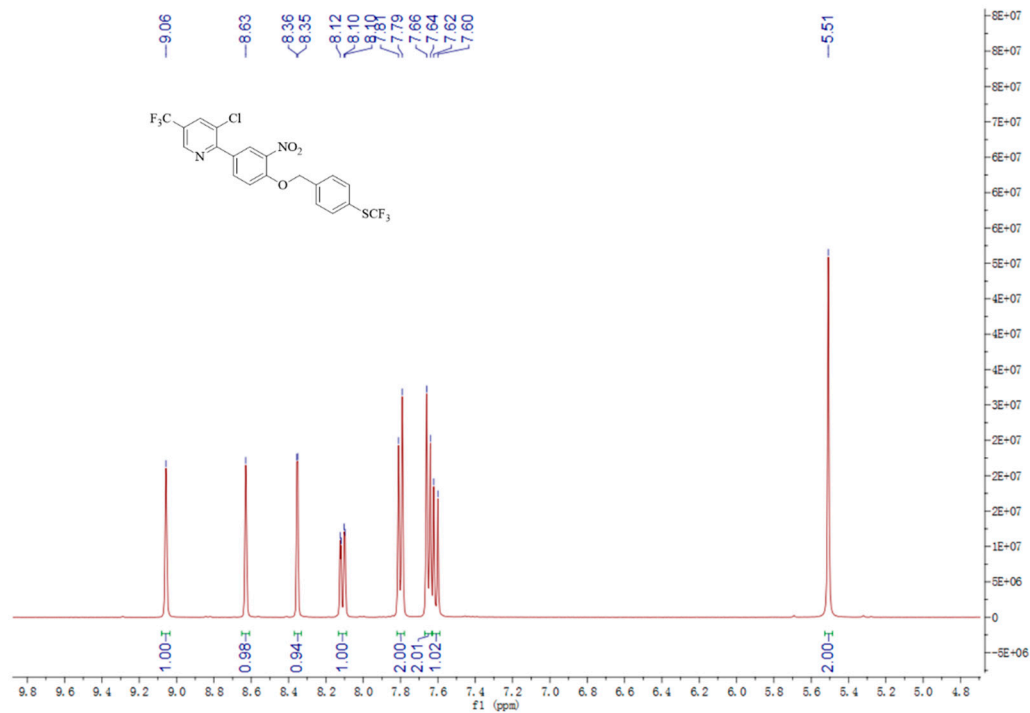

Figure S7. The <sup>1</sup>H NMR spectrum of **5d**.

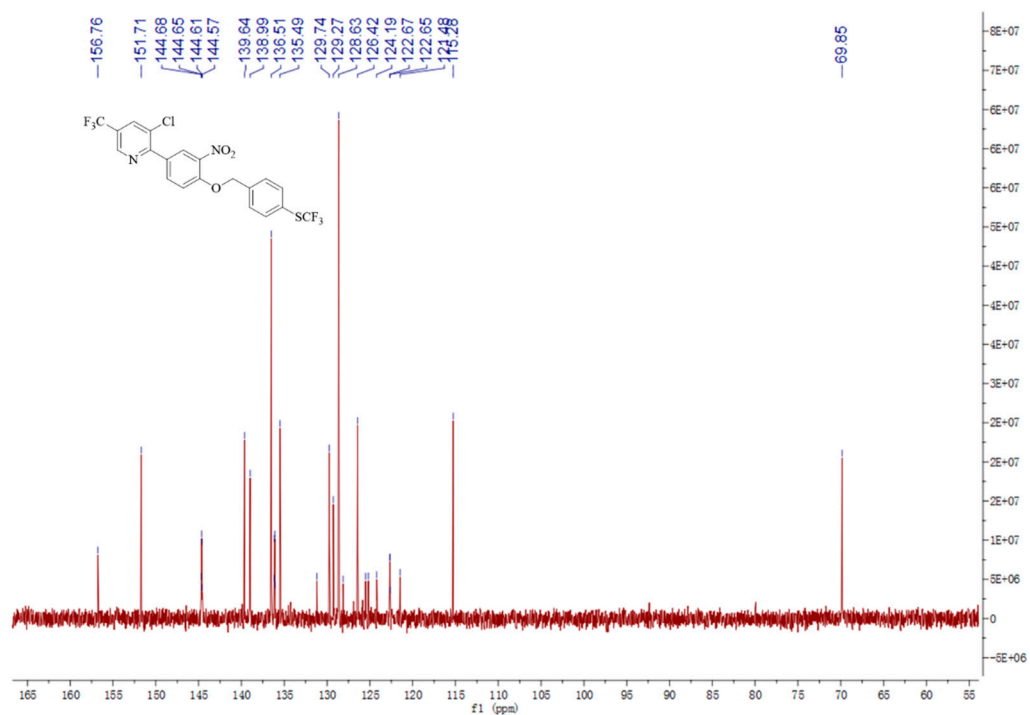

Figure S8. The <sup>13</sup>C NMR spectrum of **5d**.



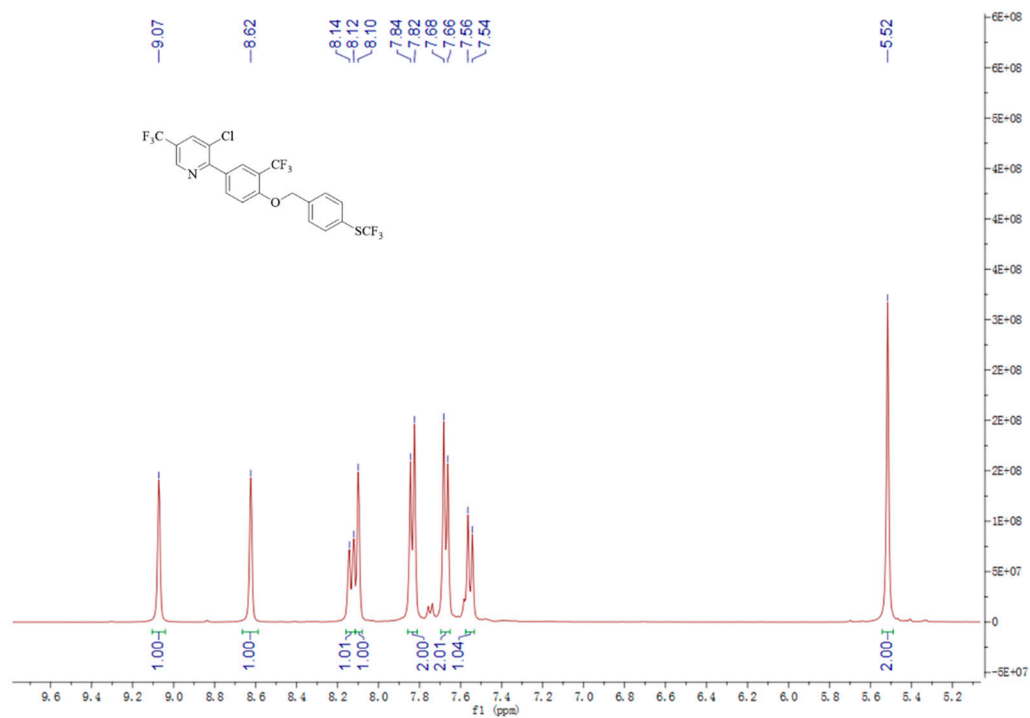

Figure S9. The <sup>1</sup>H NMR spectrum of **5e**.

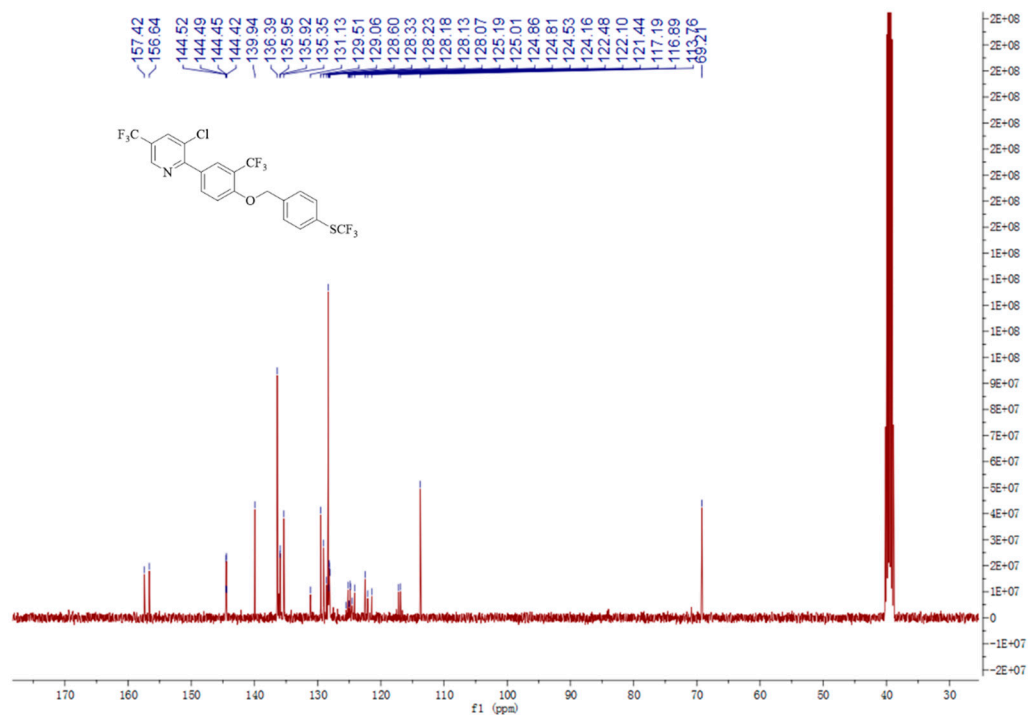

Figure S10. The <sup>13</sup>C NMR spectrum of **5e**.

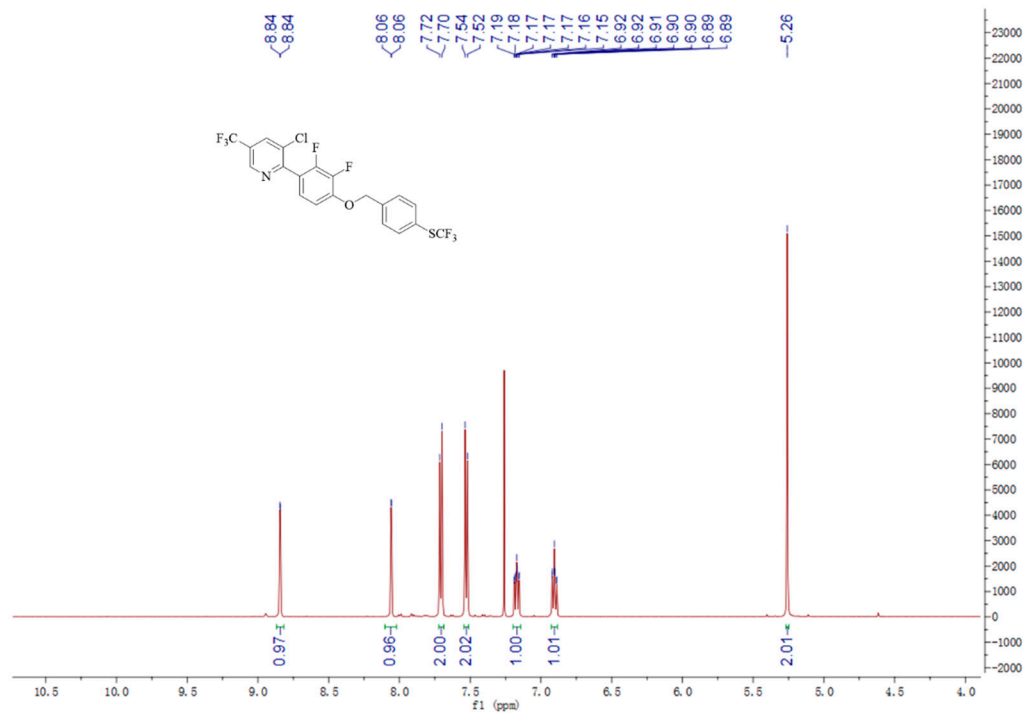

Figure S11. The <sup>1</sup>H NMR spectrum of 5f.

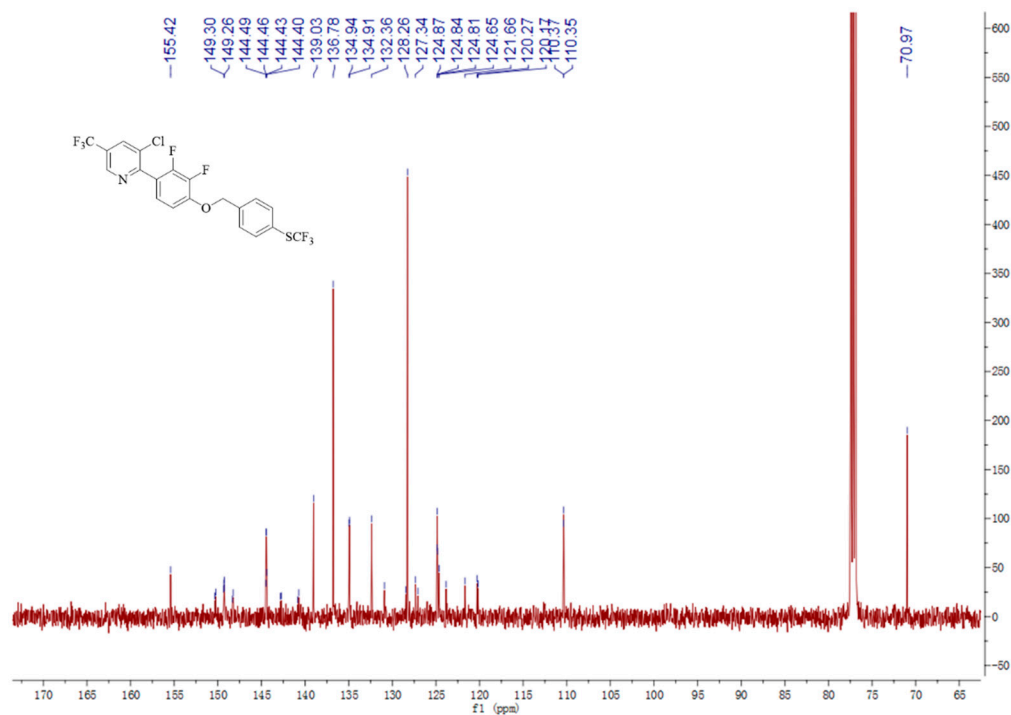

Figure S12. The <sup>13</sup>C NMR spectrum of 5f.

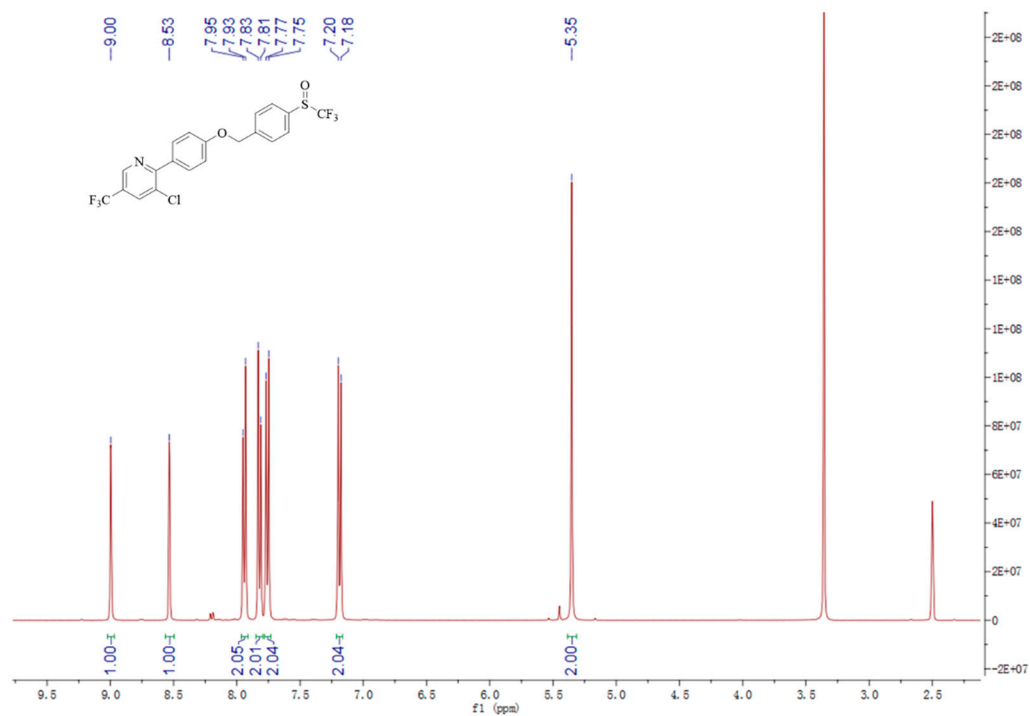

Figure S13. The <sup>1</sup>H NMR spectrum of 6a.

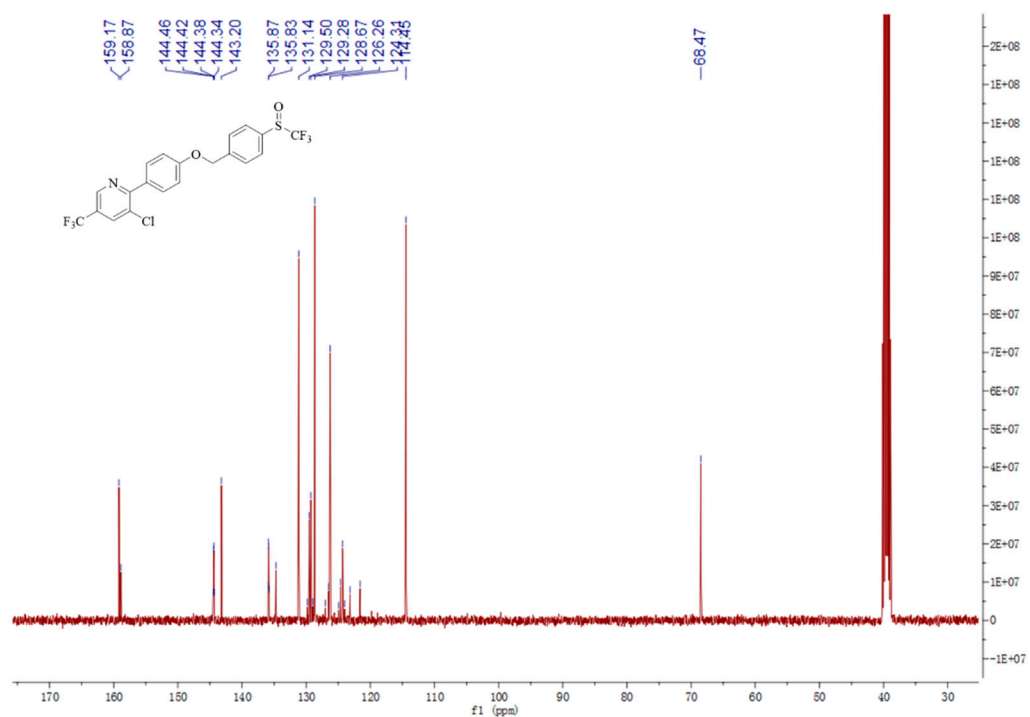

Figure S14. The <sup>13</sup>C NMR spectrum of 6a.

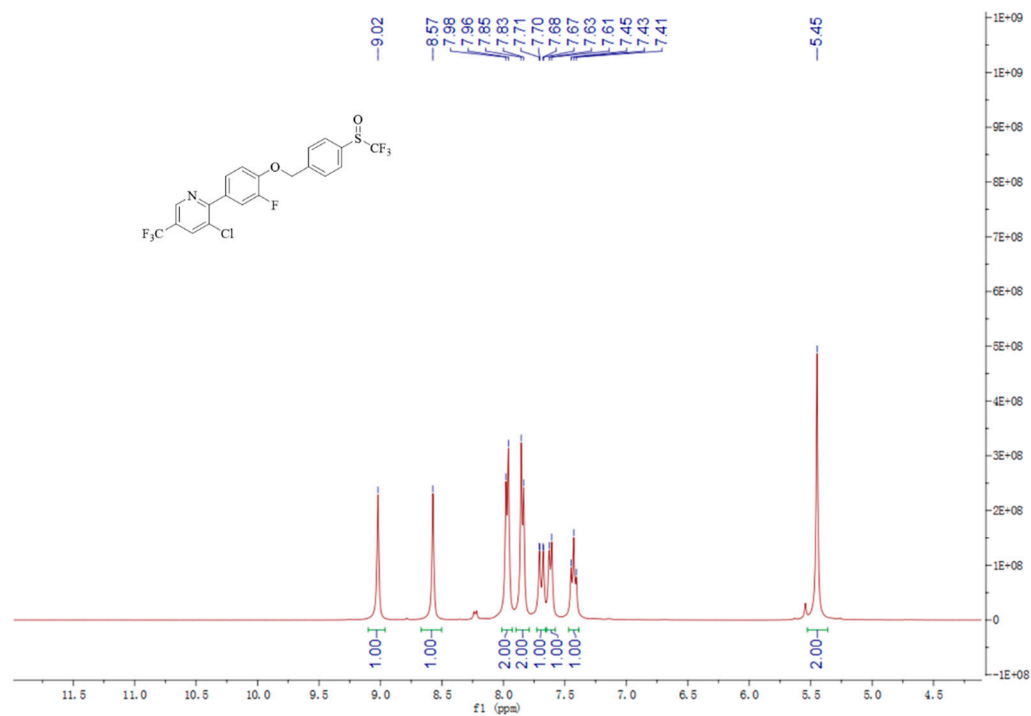

Figure S15. The <sup>1</sup>H NMR spectrum of **6b**.

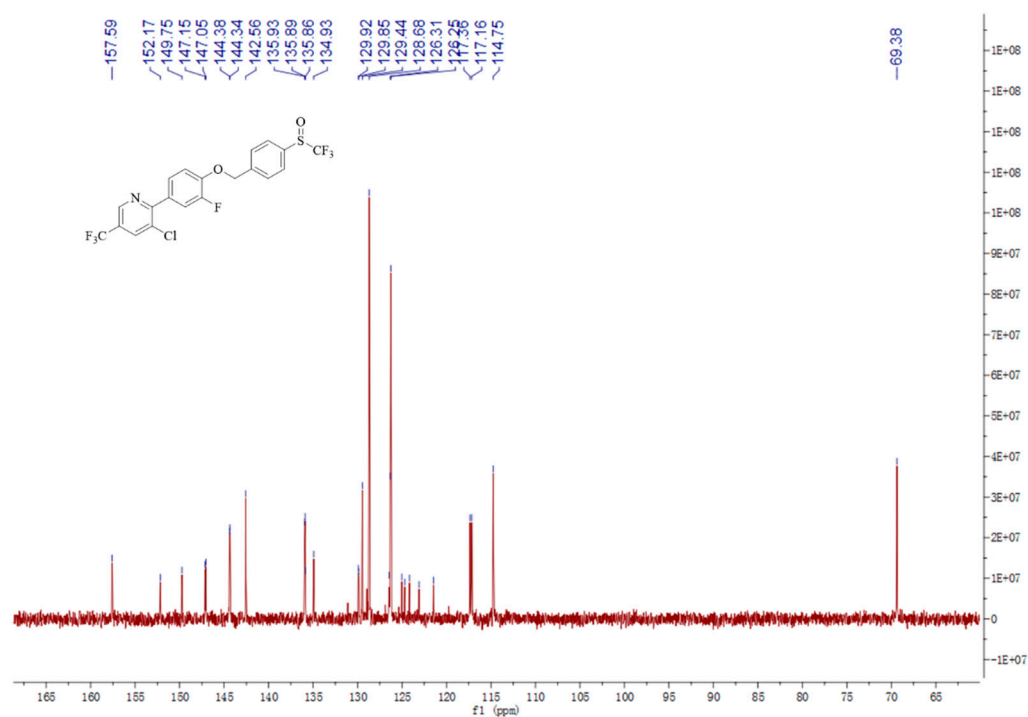

Figure S16. The <sup>13</sup>C NMR spectrum of **6b**.

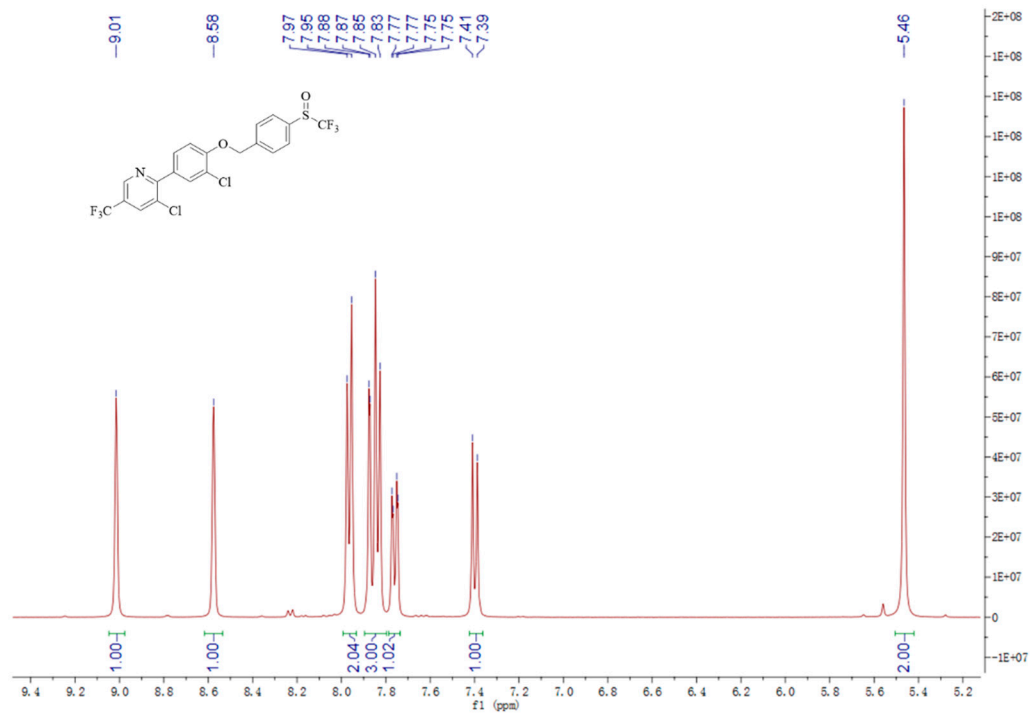

Figure S17. The <sup>1</sup>H NMR spectrum of 6c.

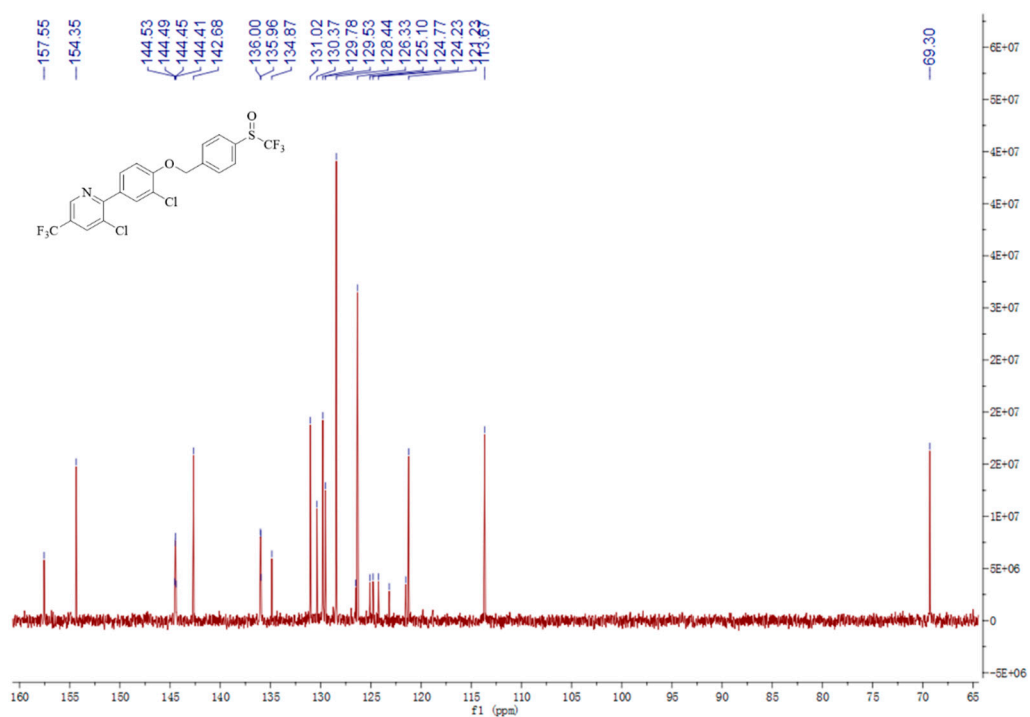

Figure S18. The <sup>13</sup>C NMR spectrum of 6c.

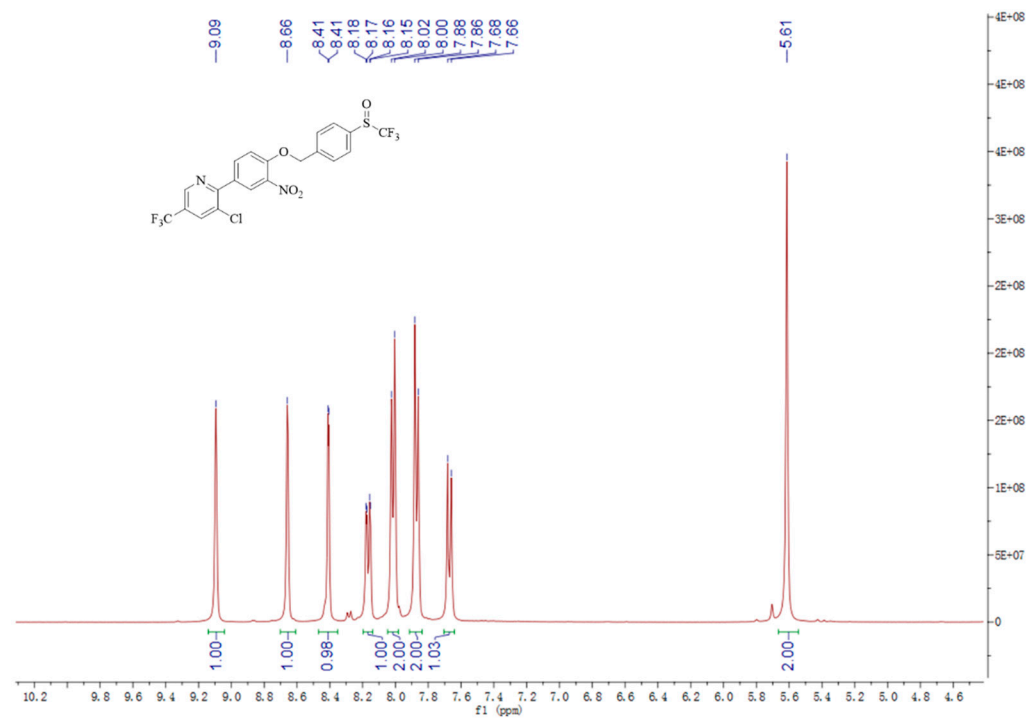

Figure S19. The <sup>1</sup>H NMR spectrum of **6d**.

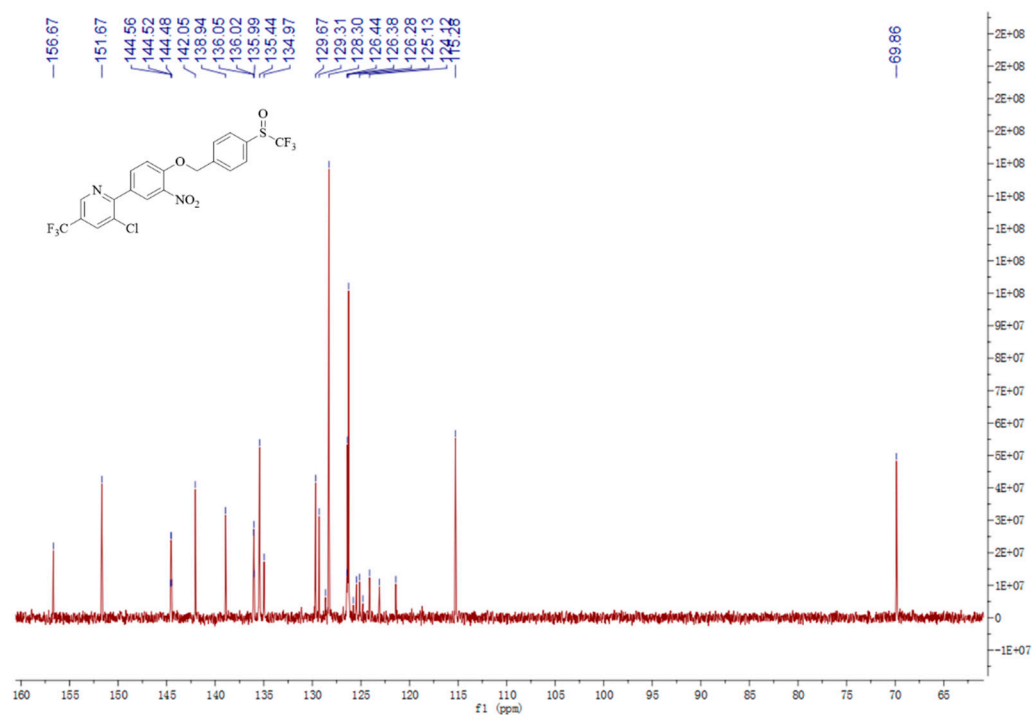

Figure S20. The <sup>13</sup>C NMR spectrum of **6d**.

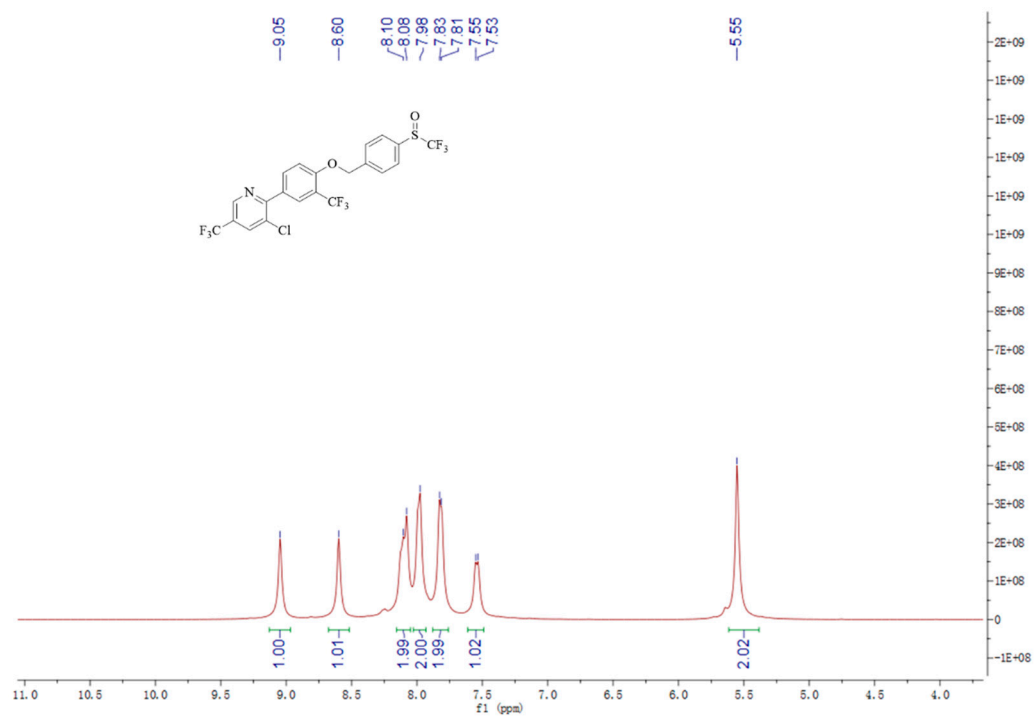

Figure S21. The <sup>1</sup>H NMR spectrum of **6e**.

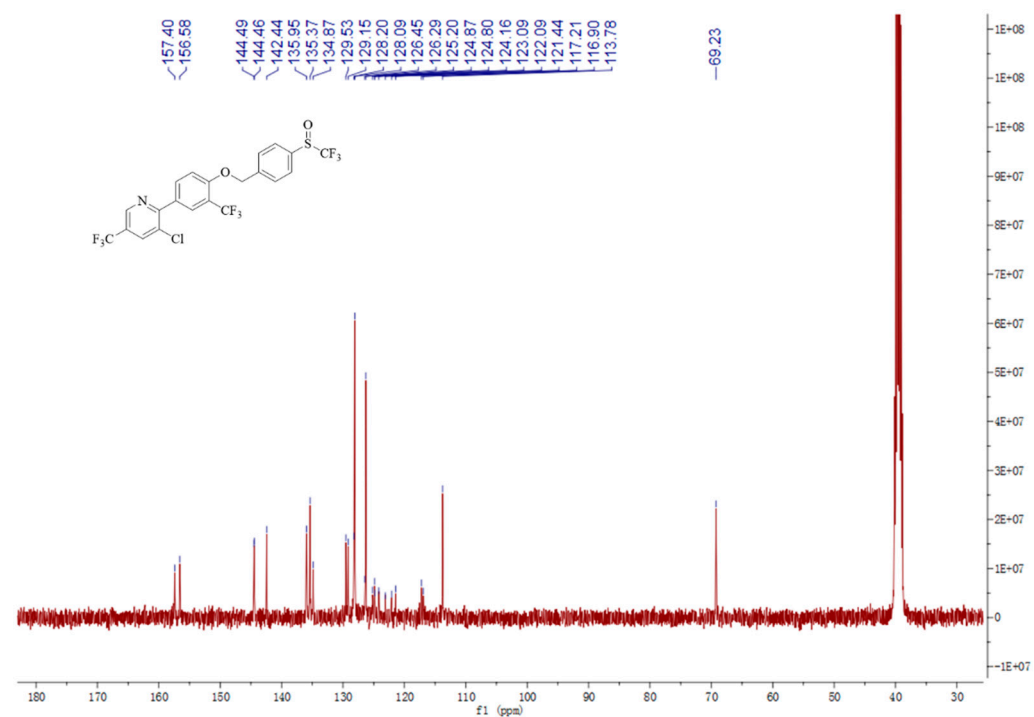

Figure S22. The <sup>13</sup>C NMR spectrum of **6e**.

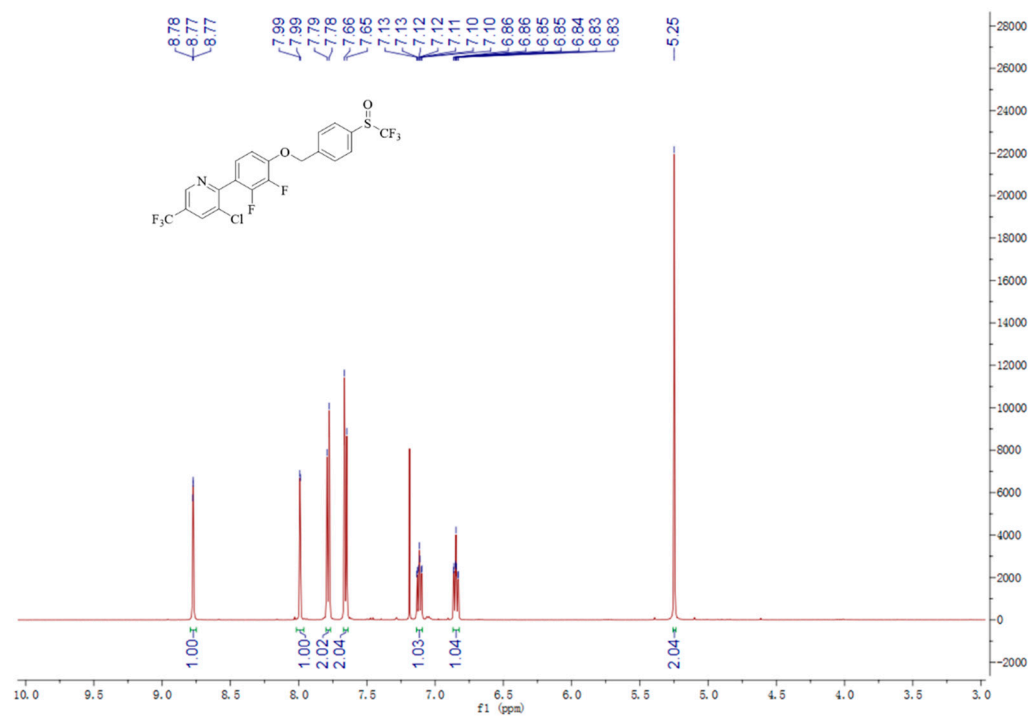

Figure S23. The <sup>1</sup>H NMR spectrum of **6f**.

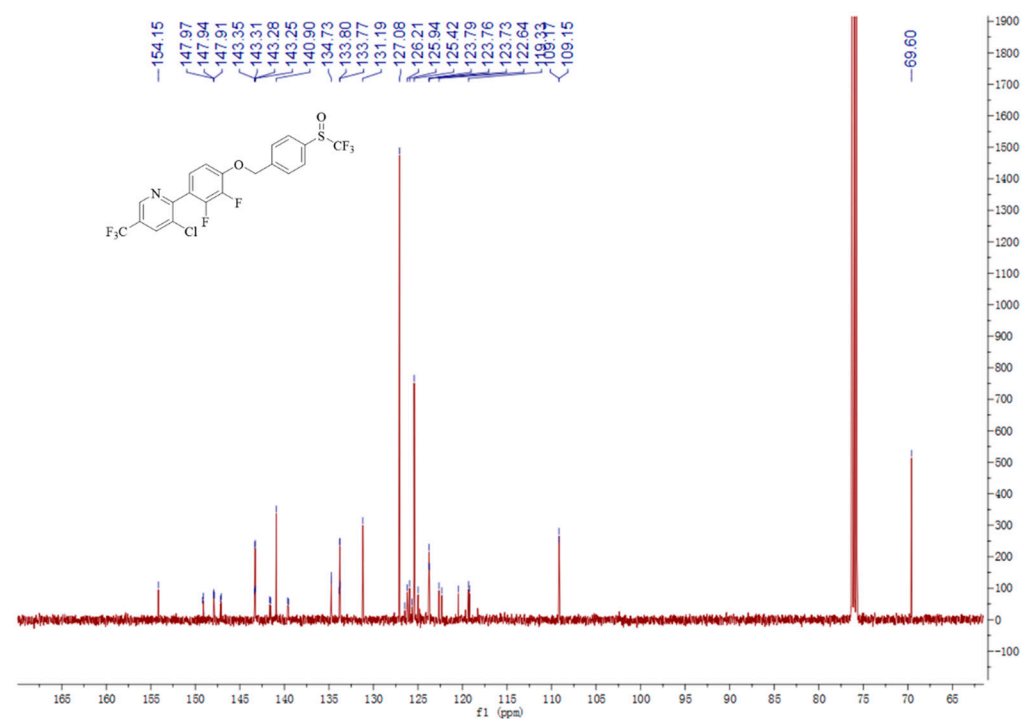

Figure S24. The <sup>13</sup>C NMR spectrum of **6f**.



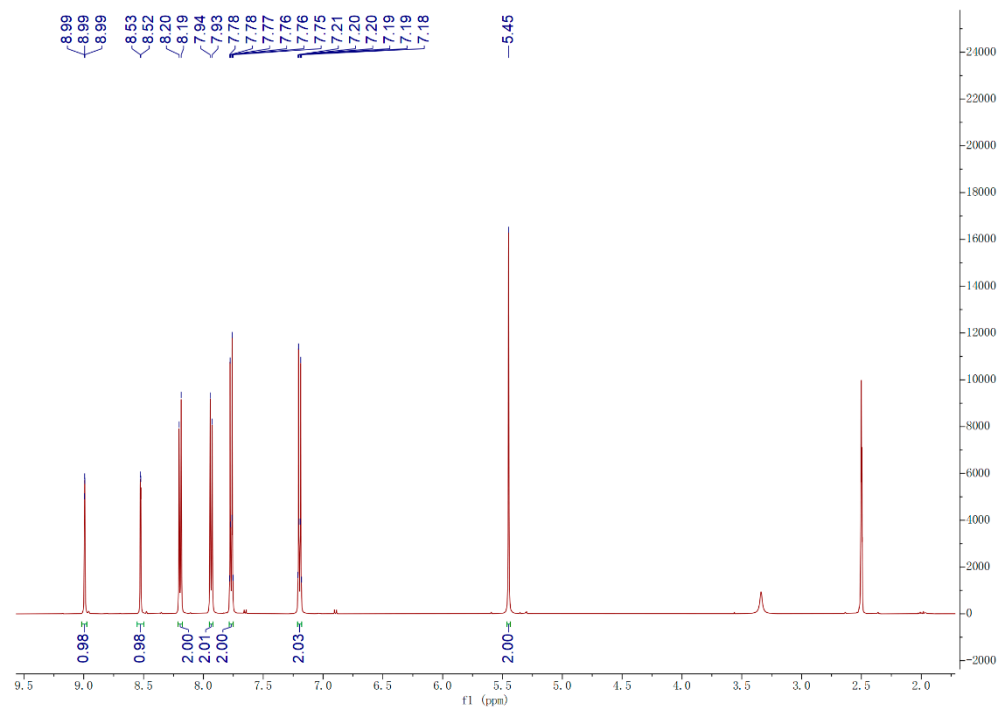

Figure S25. The <sup>1</sup>H NMR spectrum of 7a.

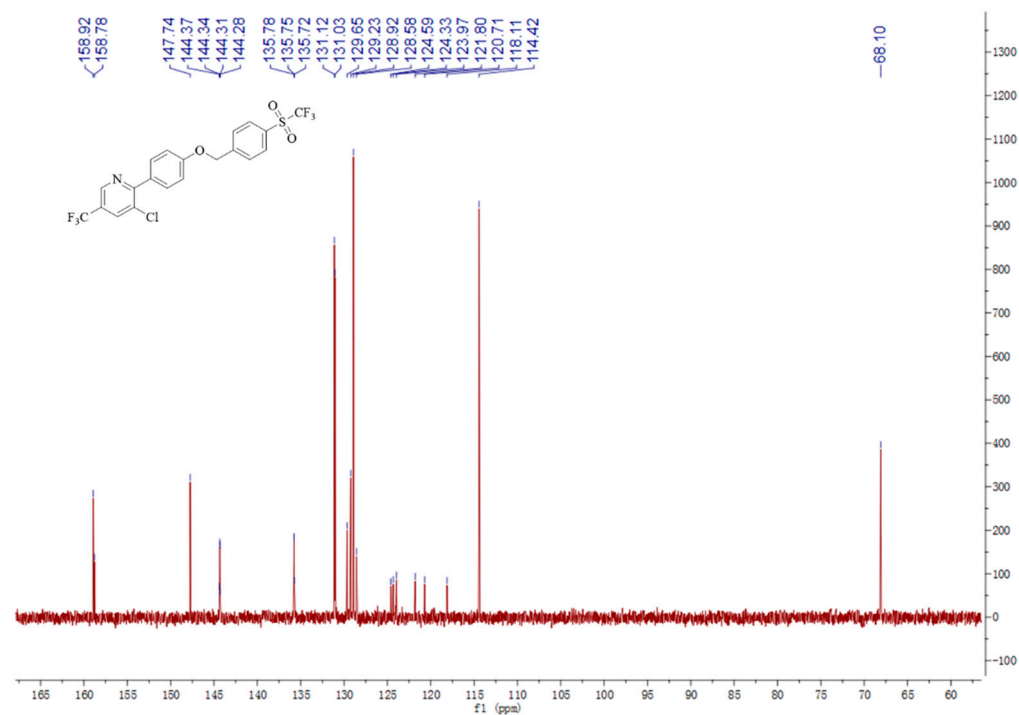

Figure S26. The <sup>13</sup>C NMR spectrum of 7a.

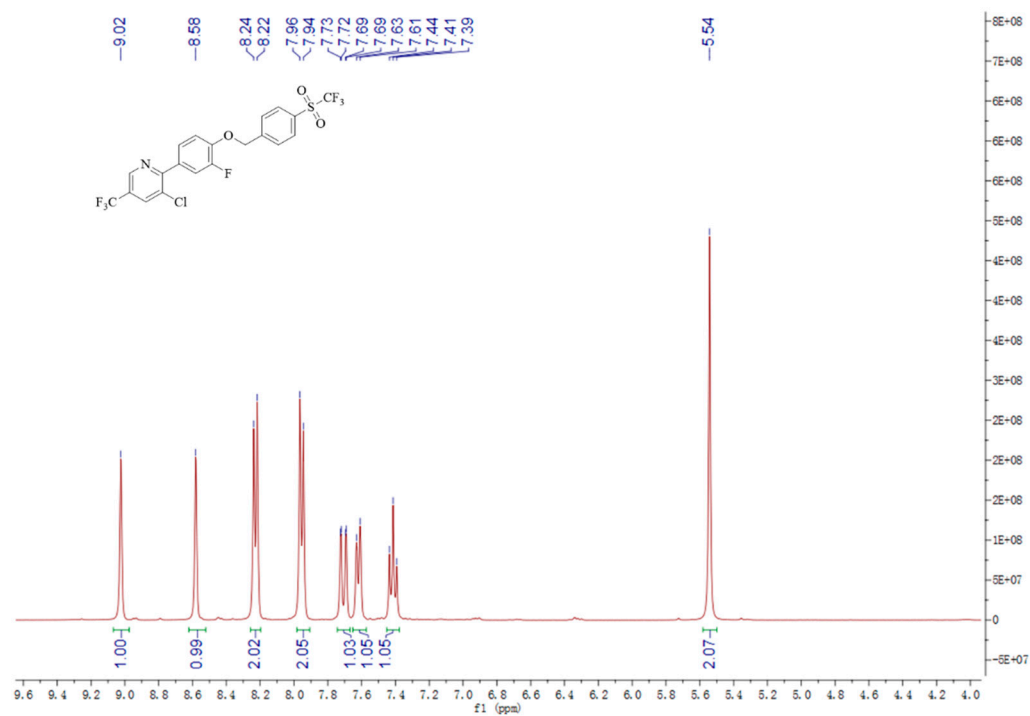

Figure S27. The <sup>1</sup>H NMR spectrum of **7b**.

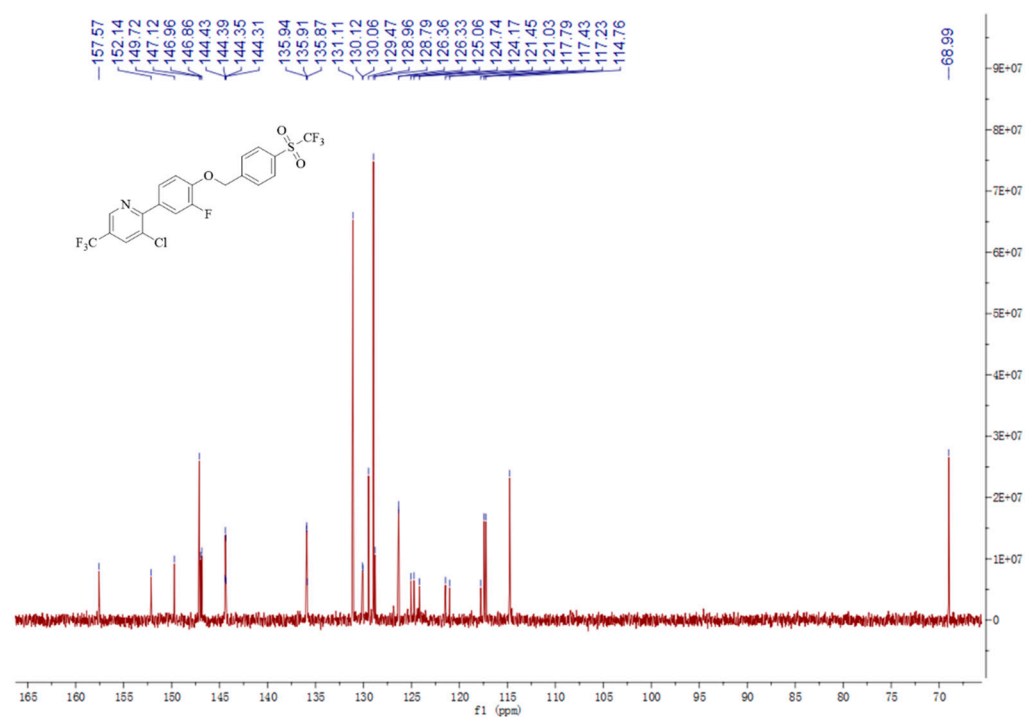

Figure S28. The <sup>13</sup>C NMR spectrum of **7b**.

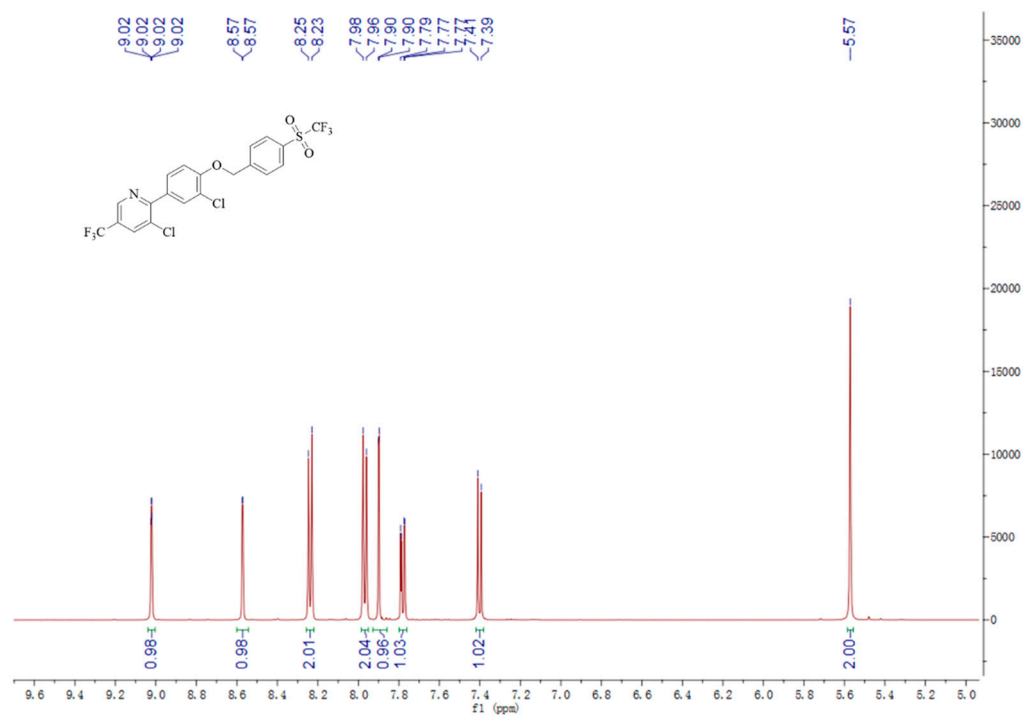

Figure S29. The <sup>1</sup>H NMR spectrum of 7c.

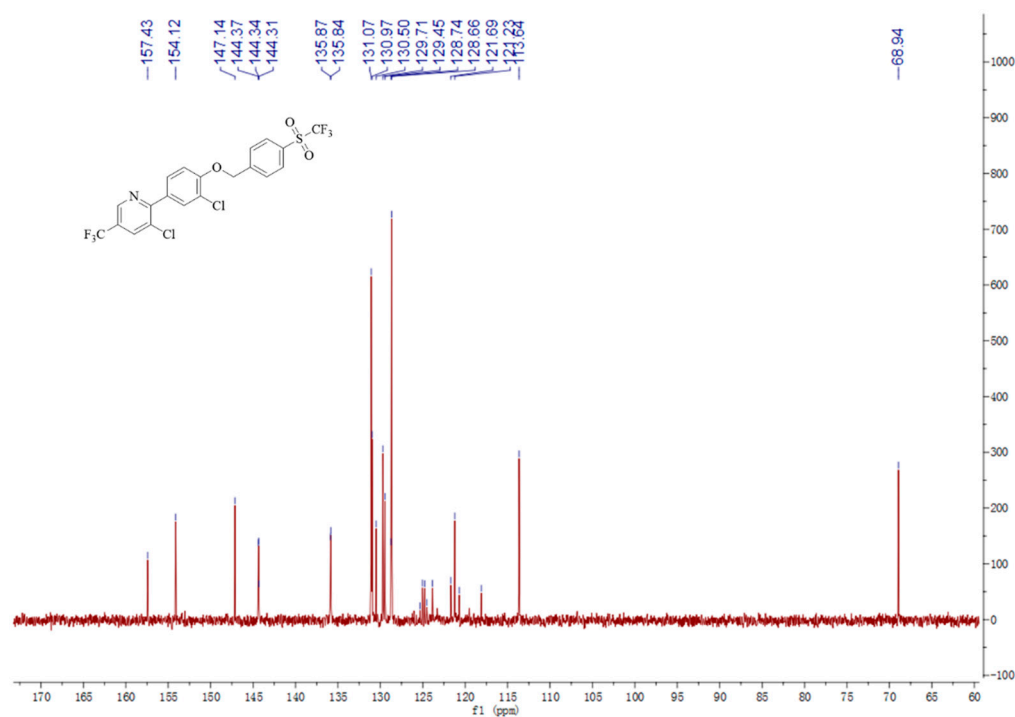

Figure S30. The <sup>13</sup>C NMR spectrum of 7c.

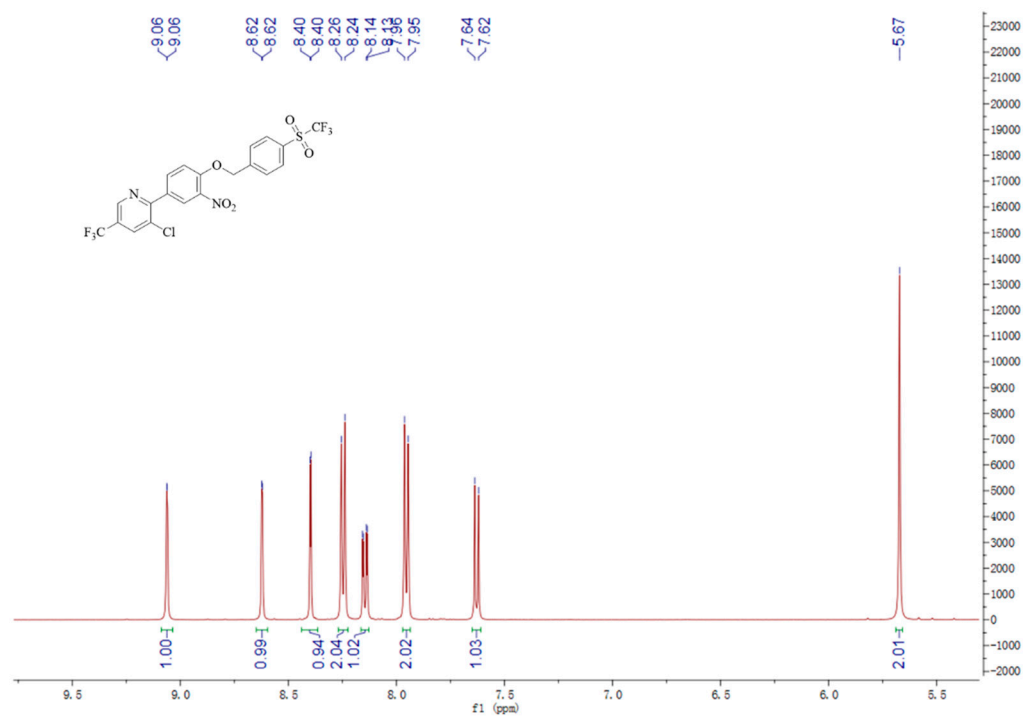

Figure S31. The <sup>1</sup>H NMR spectrum of 7d.

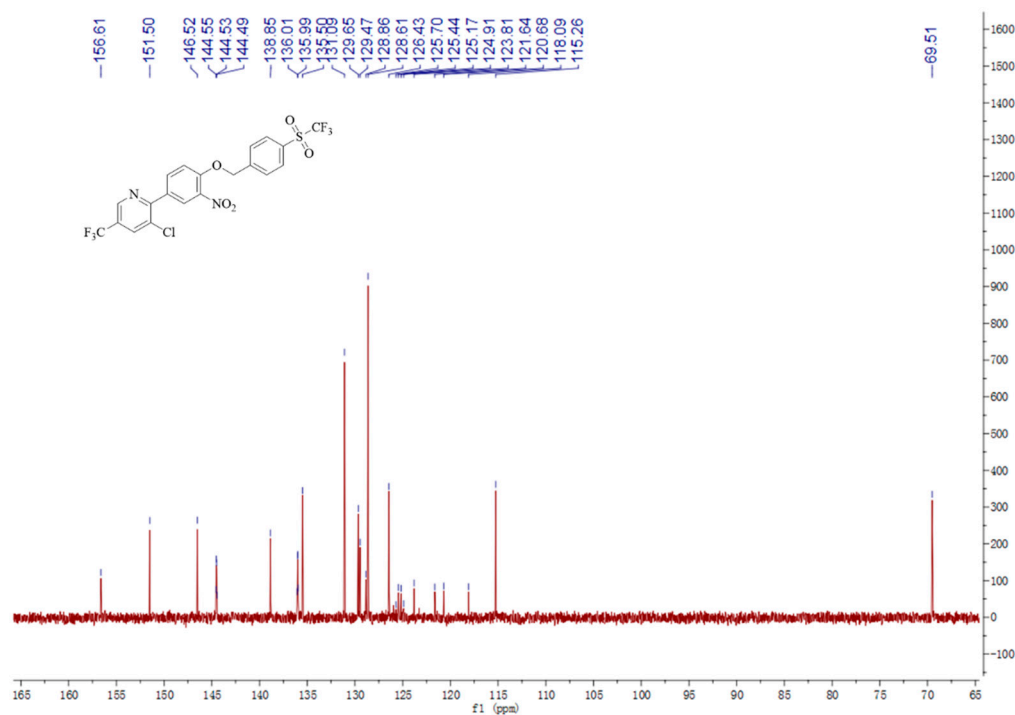

Figure S32. The <sup>13</sup>C NMR spectrum of 7d.

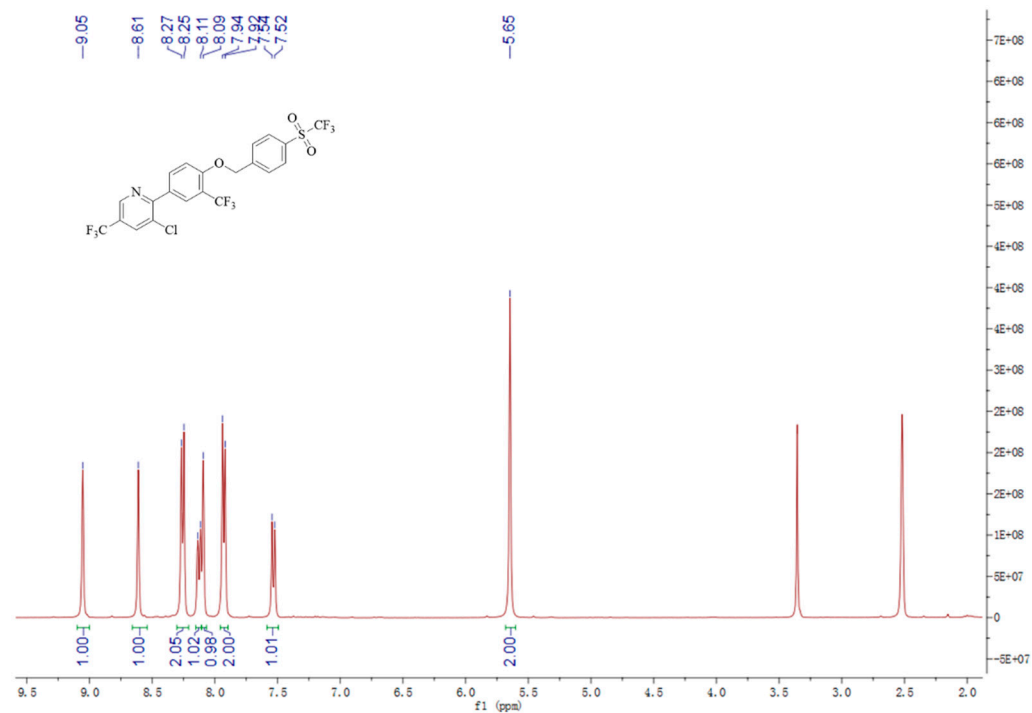

Figure S33. The <sup>1</sup>H NMR spectrum of **7e**.

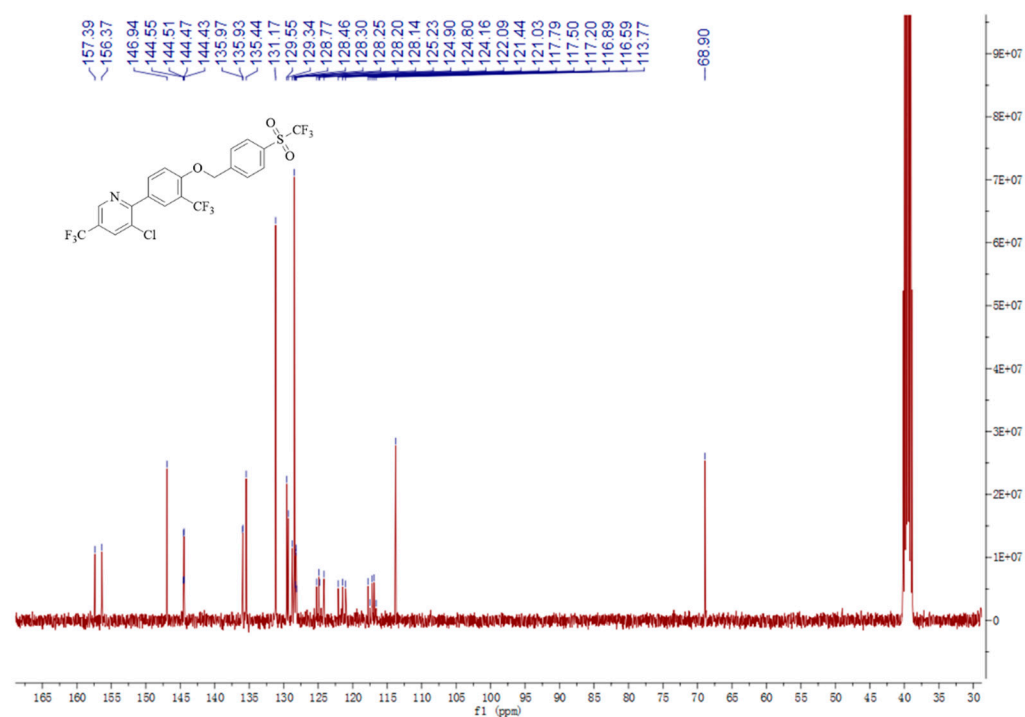

Figure S34. The <sup>13</sup>C NMR spectrum of **7e**.

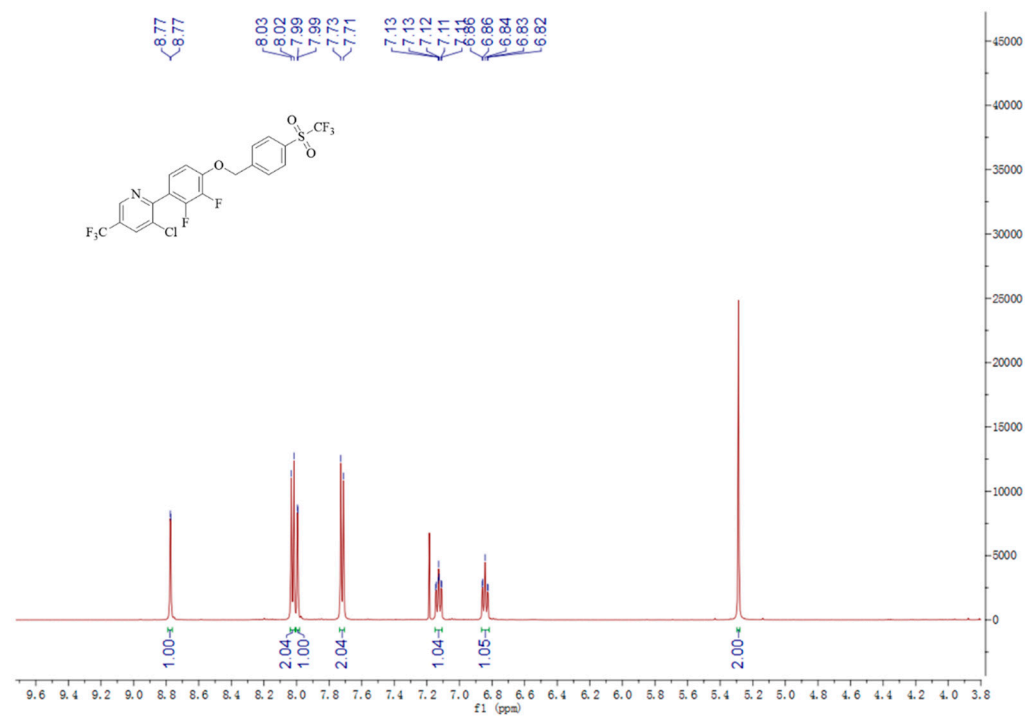

Figure S35. The <sup>1</sup>H NMR spectrum of **7f**.

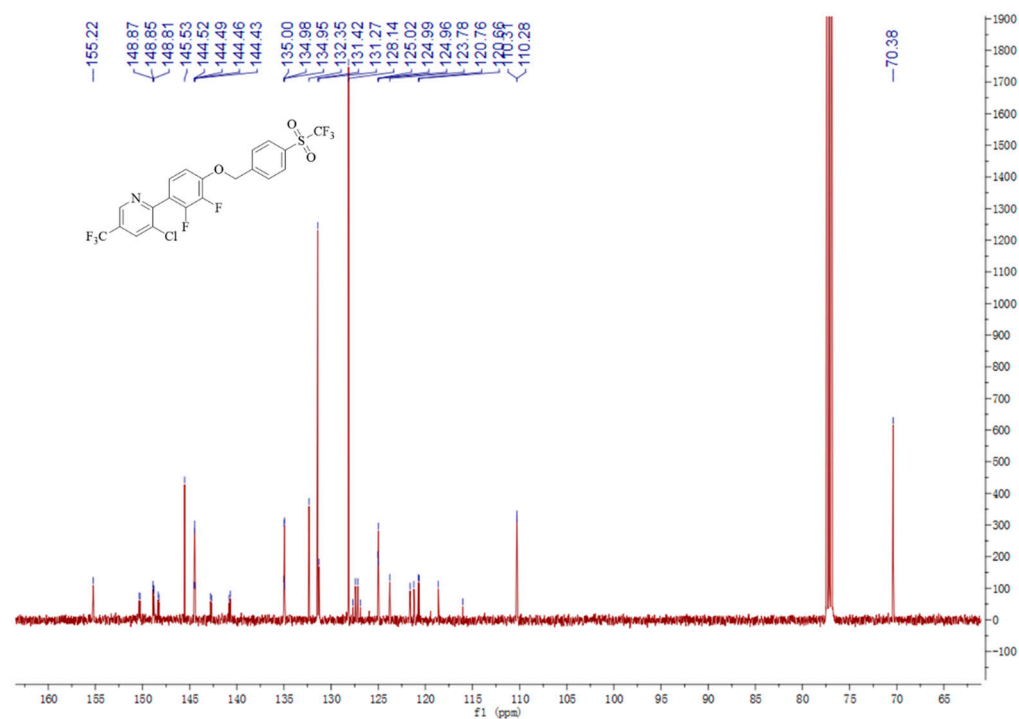

Figure S36. The <sup>13</sup>C NMR spectrum of **7f**.
